# Supplementary material
Source: PubMed Central journal article supplement (PMC3232785)
Supplement: supp_55.12.5438_supplementary_figures.pdf [file supp_55.12.5438_supplementary_figures.pdf]

## 1 Supplementary Figure 1:

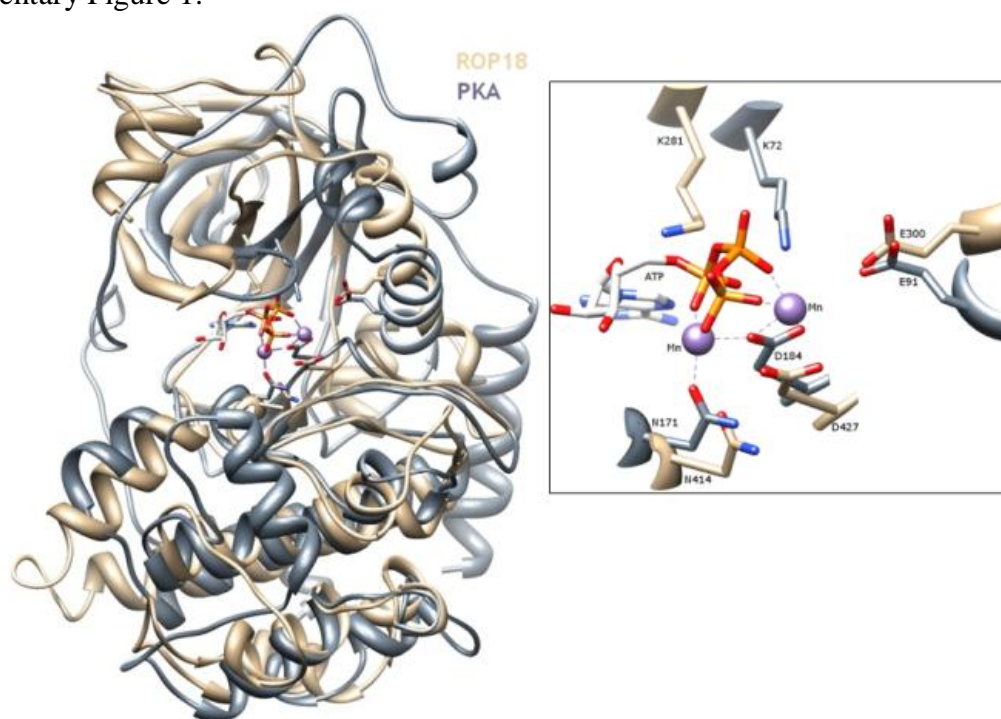

Figure S1: Superposition of ROP18<sub>II</sub> homology model (tan) and PKA (PDBID: 1ATP; grey) bound to ATP (left). An expanded view (right) of the ATP binding site and key residues involved in coordinating the position of ATP are shown. See manuscript and Figures 1 and 2 for details.

## 10    Supplementary Figure 2:

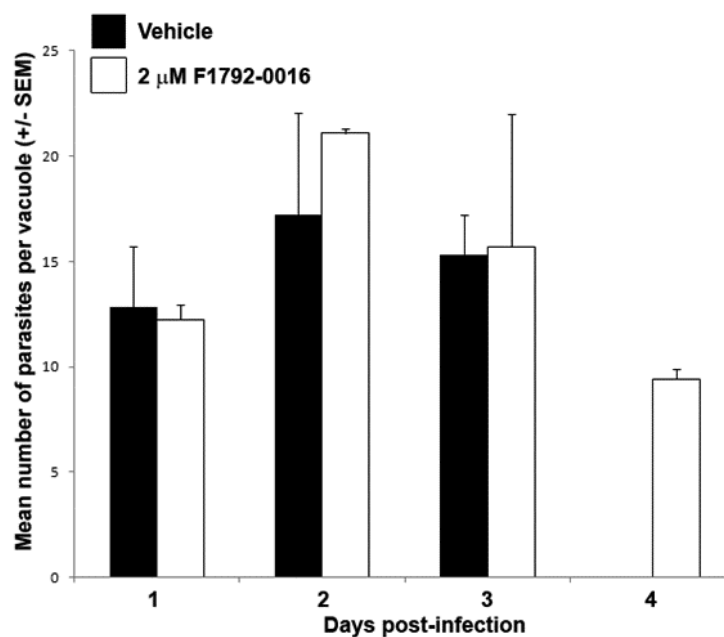

Figure S2: Mean number of parasites per vacuole in vehicle and 2  $\mu$ M F1792-0016-treated parasites during days 1-4 post-infection. By day 4 post-infection the vehicle-treated parasites had completely lysed the monolayer and therefore it was not possible to count vacuoles.

## Supplementary Figure 3:

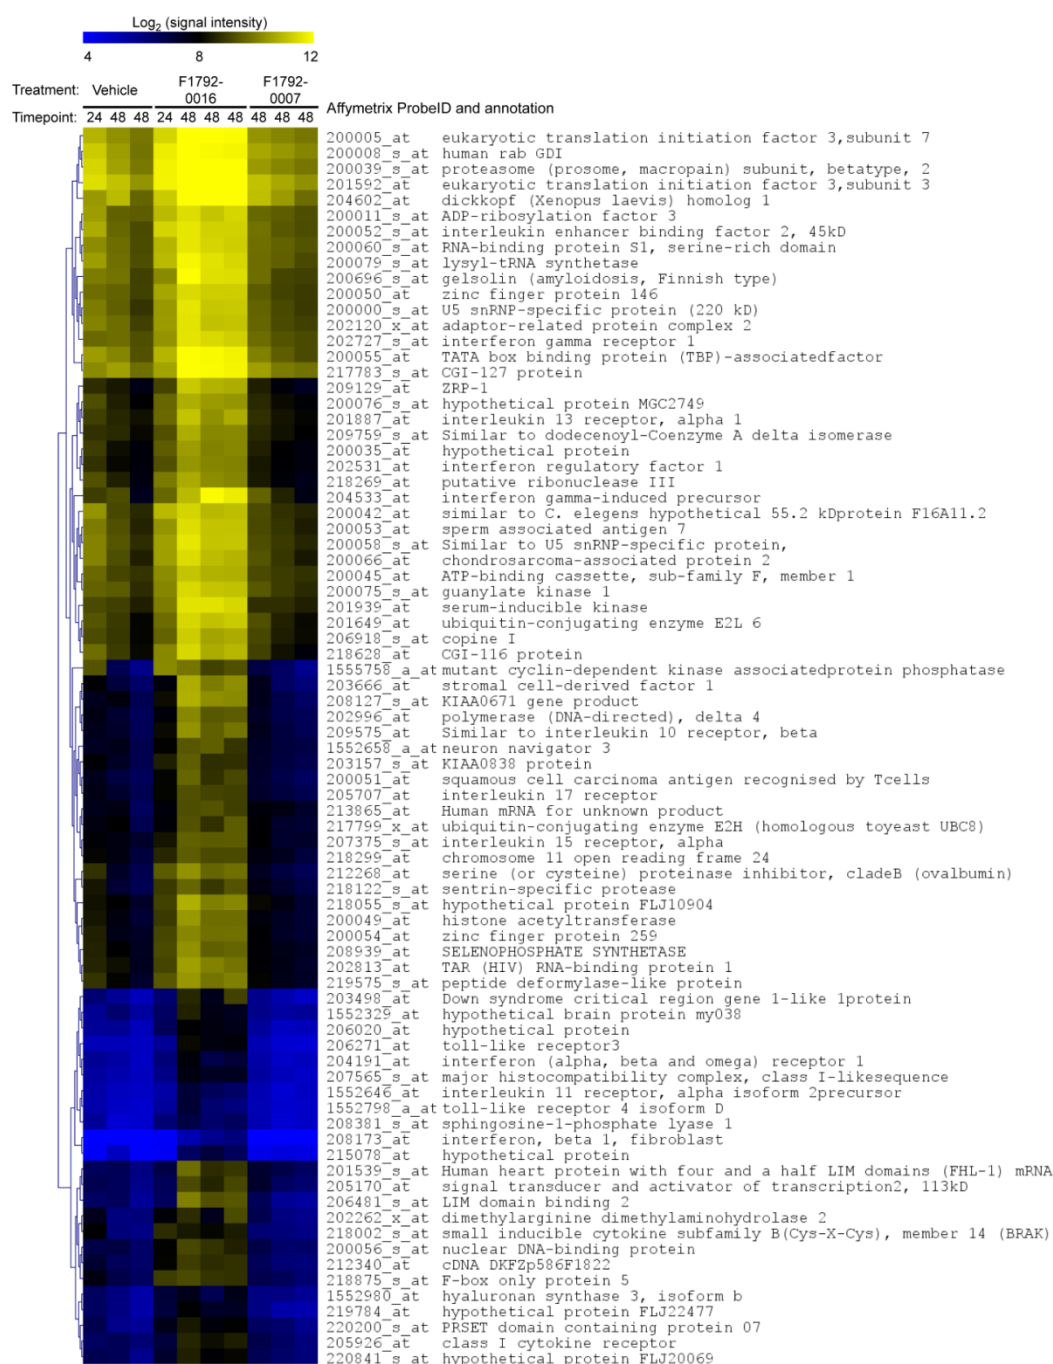

Figure S3: Heat map of human genes queried on the *Toxoplasma* gene chip demonstrating the effects of compound treatment on transcription in infected cells. All genes shown were found to be of higher abundance in the presence of F1729-0016. Genes with an adjusted P-value < 0.05 and a fold-change > 3 for F1792-0016 treated parasites and host cells versus vehicle controls are shown.
